# A putative ER-PM contact site complex relocates in response to Rare Earth Elements –induced endocytosis

EunKyoung Lee<sup>1,\*</sup>, Brenda Vila Nova Santana<sup>1,2\*</sup>, Elizabeth Samuels<sup>1</sup>, Francisco Benitez-Fuente<sup>1</sup>, Erica Corsi<sup>1</sup>, Miguel A. Botella<sup>3</sup>, Jessica Perez-Sancho<sup>3,7</sup>, Steffen Vanneste<sup>4,5,6</sup>, Jiří Friml<sup>7</sup>, Alberto Macho<sup>8</sup>, Aristeia Alves Azevedo<sup>2</sup>, Abel Rosado<sup>1, a</sup>

<sup>1</sup>Department of Botany, Faculty of Sciences. University of British Columbia, Vancouver, V6T 1Z4, Canada.

<sup>2</sup>Laboratório de Anatomia Vegetal, Departamento de Biologia Vegetal, Universidade Federal de Viçosa, 36570-900 Viçosa, Minas Gerais, Brazil

<sup>3</sup>Instituto de Hortofruticultura Subtropical y Mediterránea, Universidad de Málaga–Consejo Superior de Investigaciones Científicas (IHSM-UMA-CSIC), Departamento de Biología Molecular y Bioquímica, Facultad de Ciencias, Universidad de Málaga, 29071 Málaga, Spain.

<sup>4</sup>Department of Plant Biotechnology and Bioinformatics, Ghent University, Ghent, Belgium.

<sup>5</sup>Center for Plant Systems Biology, VIB, Ghent, Belgium

<sup>6</sup>Lab of Plant Growth Analysis, Ghent University Global Campus, Incheon 21985, Korea.

<sup>7</sup>Institute of Science and Technology (IST), Klosterneuburg, Austria.

<sup>8</sup>Shanghai Center for Plant Stress Biology, CAS Center for Excellence in Molecular Plant Sciences, Shanghai Institutes of Biological Sciences, Chinese Academy of Sciences, Shanghai, 201602 China.

\*Equal contributors.

<sup>a</sup>Corresponding author: [abel.rosado@botany.ubc.ca](mailto:abel.rosado@botany.ubc.ca)

## ABSTRACT

In plant cells, environmental stressors induce changes in the cytosolic concentration of calcium ( $[Ca^{2+}]_{cyt}$ ) that are transduced by  $Ca^{2+}$ -sensing proteins. To confer specificity to the stress signaling response,  $[Ca^{2+}]_{cyt}$  sensing must be tightly regulated in space and time; the molecular mechanisms that restrict the localization and dynamics of  $Ca^{2+}$  sensors in plants, however, are largely unknown. In this report, we identify a putative  $Ca^{2+}$ -sensitive complex containing the synaptotagmins 1 and 5 (SYT1 and SYT5) and the  $Ca^{2+}$ -dependent lipid binding protein (CLB1), which is enriched at ER-PM contact sites (EPCS) and relocates in response to Rare Earth Elements (REEs)-induced endocytosis. Our results show that endocytosed REEs influence cytosolic  $Ca^{2+}$  signaling, as indicated by the activation of the  $Ca^{2+}$ /Calmodulin-based ratiometric sensor GCaMP3, and promote the cytoskeleton-dependent accumulation of ER-PM contact sites at the cell cortex. Based on these results, we propose that the EPCS-localized SYT1/SYT5/CLB1 complex is part of an evolutionarily conserved and

spatially regulated  $\text{Ca}^{2+}$ -responsive mechanism that control cER-PM communication during stress episodes.

## Introduction

Plant cells respond to different environmental stressors by changing their cytosolic free calcium concentration ( $[\text{Ca}^{2+}]_{\text{cyt}}$ ). These changes in  $[\text{Ca}^{2+}]_{\text{cyt}}$  act as secondary messengers, and their specific amplitude and duration (known as  $\text{Ca}^{2+}$  signature) provide specificity to the cellular responses [1]. In yeast and mammalian cells, the Endoplasmic Reticulum (ER) –Plasma Membrane (PM) Contact Sites' (EPCS) microdomains act as  $\text{Ca}^{2+}$ -sensitive platforms where EPCS-associated proteins sense changes in  $[\text{Ca}^{2+}]_{\text{cyt}}$  and regulate the non-vesicular transfer of signaling molecules (e.g. lipids) between the cortical ER (cER) and the PM [2-4]. In Arabidopsis, the spatial and dynamic organization of EPCS is regulated by at least three families of EPCS components, namely, synaptotagmins (SYTs), Vesicle-associated membrane protein (VAMP)-associated proteins 27 (VAP27s), and VAP-RELATED SUPPRESSORS OF TOO MANY MOUTHS (VSTs) [5]. These EPCS components in plants serve a number of well-characterized functions including response to biotic and abiotic stressors, [6-14], the control of the interactions between the ER and the cortical cytoskeleton [15-16], and the activation of signal transduction events through the activation of Receptor-like Kinases at the PM [17]. Despite this wealth of functional information, the specific responses of plant EPCS components to stress-derived  $\text{Ca}^{2+}$  signals remain largely uncharacterized.

This work focuses on the  $\text{Ca}^{2+}$ -dependent phospholipid binding protein SYT1, which shares structural organization with the mammalian extended-synaptotagmins (E-Syts) and yeast tricalbins (Tcbs) families of  $\text{Ca}^{2+}$ -responsive EPCS tethers [18]. At the structural level, SYT1 is anchored to the cER, targeted to EPCS through a putative synaptotagmin-like mitochondrial lipid-binding domain (SMP) [19], and docked to the PM through  $\text{Ca}^{2+}$ -dependent interactions between its C2 domains and negatively charged phospholipids [6, 7, 20, 21]. At the functional level, SYT1 interacts with elements of the exocytotic soluble N-ethylmaleimide-sensitive factor attachment protein receptor complexes (SNAREs) [9], phytosterol binding proteins [24], and reticulon

proteins [25]. These interactions are required for the maintenance of the cER stability [13], the control of immune secretory pathways [9], the regulation of cell-to-cell communication [10-12], and the tolerance to ionic, mechanical and freezing stresses [6, 7, 14]. The specific role of stress-derived  $\text{Ca}^{2+}$  signals in the regulation of SYT1 activity and EPCS organization, however, remains largely uncharacterized.

This study identifies a putative tethering complex formed by the Synaptotagmins 1 (SYT1) and 5 (SYT5) and the  $\text{Ca}^{2+}$ -dependent lipid binding protein CLB1. This complex is enriched at ER-PM contact sites, responds to environmental stresses, and induces EPCS rearrangements in response to Rare Earth Elements (REEs)-induced endocytosis. Mechanistically, this study shows that long-term exposure to REEs induces the accumulation of phosphatidylinositol-4-phosphate (PI4P) at the PM, promotes the internalization of PI4P-containing vesicles, activates the Calmodulin-GFP based  $\text{Ca}^{2+}$  sensor GCaMP3 [26], and triggers the concomitant accumulation of SYT1/SYT5/CLB1 containing EPCS at the cell cortex. The study also highlights clear differences between the EPCS remodeling triggered by NaCl, which is largely cytoskeleton-independent [8], and the EPCS accumulation triggered by REE-endocytosis, which is largely cytoskeleton-dependent. Our results support a model where EPCS tethering complexes act as  $\text{Ca}^{2+}$  sensing platforms that regulate cortical ER-PM communication in response to stress-induced changes in cytosolic  $\text{Ca}^{2+}$  signaling. These examples illustrate the plasticity that governs cER-PM communication, an evolutive milestone of eukaryotic organisms, and highlight the role of evolutionarily conserved tethering complexes in the coordination of cellular responses to environmental stress.

## Results

### Identification of SYT1/SYT5/CLB1 as a putative $\text{Ca}^{2+}$ -binding tethering complex in Arabidopsis.

SYT1 is a protein tether implicated in the establishment, organization, and function of plant ER-PM contact sites (EPCS) [6-14]. Because the SYT1 orthologs in mammals and yeast establish tethering complexes *in vivo* [27-28], and multiple proteins containing C2 domains and TM regions are able to tether membranes in Arabidopsis plasmodesmata [29], we searched for additional proteins physically associated with SYT1 that could participate in EPCS establishment and/or regulation. For this purpose, we used a SYT1-GFP line in the *syt1-2* background [8] and performed immunoprecipitation (IP) assays using agarose beads coupled to an anti-GFP nanobody (GFP-Trap beads). The IP results from three independent biological replicates provided a large number of proteins physically associated with SYT1 that we identified using liquid chromatography coupled to tandem mass-spectrometry (LC-MS/MS). We filtered the results using the following criteria: 1. Presence in all three biological replicates; 2. Detection of two or more exclusive unique peptides; and 3. Absence in the negative immunoprecipitation control (IP using a transgenic line expressing free GFP). After applying these filters we identified two putative SYT1 interactors: the Arabidopsis Synaptotagmin 5 (*At1g05500*, SYT5), an uncharacterized member of the Arabidopsis synaptotagmin family, and the  $\text{Ca}^{2+}$  and lipid binding protein 1 (*At3g61050*, CLB1), a protein involved in drought and NaCl stress responses [30] (Table 1A and Table S1). To confirm the interaction between SYT1 and these two proteins we used a targeted co-IP assay. For this experiment we generated a transgenic line expressing SYT5-GFP under its native promoter (SYT5::SYT5-GFP) and a transgenic line expressing CLB1-GFP under a constitutive ubiquitin 10 promoter (*pUB10::CLB1-GFP*). Upon immunoprecipitation using SYT5::SYT5-GFP and *pUB10::CLB1-GFP*, we performed hybridization with a custom antibody raised against SYT1 [7]. Our results confirmed that

the native SYT1 associates with SYT5-GFP and CLB1-GFP, but not with free GFP  
(Figure 1B).

To determine the relative abundance and tissue specificity of the putative SYT1/SYT5/CLB1 complex (hereafter SSC complex) we used freely available RNAseq data from the transcriptomic variation database (TraVa) [31]. Table S2 shows that the SYT1, SYT5 and CLB1 genes are ubiquitously expressed, and that the SYT1 transcripts are, on average, three times more abundant than SYT5's and two times more abundant than CLB1's across multiple tissues. We also assigned putative functions for SYT5 and CLB1 through the identification of their functional domains using Pfam [32] and TMHMM2 [33] databases. The analyses show that SYT1, SYT5, and CLB1 share a common domain architecture comprising a putative single N-terminal TM domain, a ~40 amino acid linker, a cytoplasm-exposed synaptotagmin-like mitochondrial lipid-binding protein (SMP) domain; and one (CLB1) or two (SYT1 and SYT5) phospholipid-binding C2 domains harboring Lysine/Arginine rich (K/R-rich) polybasic patches (Figure 1C and Figure S1). Next, we generated 3D structures for the predicted cytosolic regions of these proteins (SYT1<sub>30-541</sub>), (SYT5<sub>23-560</sub>) and (CLB1<sub>22-510</sub>) using the Phyre2 [34] and 3DLigandSite [35] modelling tools. The results show that 89% of the SYT1 aminoacid residues, 87% of the SYT5 aminoacid residues, and 69% of the CLB1 residues could be modelled with >90% confidence using the crystal structure of the mammalian extended synaptotagmin 2 as a template (Figures 1D-1F). Furthermore, the 3DLigandSite analyses also show that all three proteins contain a single Ca<sup>2+</sup> binding site, whose position was determined with confidence levels above the 99% threshold (Figures 1D-1F Insets). Based on the *in vitro* interactions, and the subsequent bioinformatics analyses, we propose that SYT1, SYT5 and CLB1 are part of a putative Ca<sup>2+</sup>-binding tethering complex (hereafter SSC complex) that is ubiquitously expressed in Arabidopsis.

## The putative SSC complex is enriched at EPCS and is required for root hair polarity maintenance.

To establish unequivocally the subcellular localization of the putative SSC complex *in vivo*, we generated fluorescent SYT5-GFP and CLB1-GFP marker lines

driven by their respective endogenous promoters, and used confocal microscopy to compare the SYT5-GFP and CLB1-GFP subcellular localization with that of the SYT1-GFP marker [8]. **Figure 2** shows that the SYT5-GFP and CLB1-GFP localization strongly resemble that of the SYT1-GFP marker in all tissues analyzed. These localizations include a “beads and strings” arrangement in cotyledon epidermal cells (**Figures 2A-2C**), perinuclear labelling consistent with ER in root meristematic cells (**Figures 2D-2F**), strong accumulation of signals at root hair initiation sites (**Figures 2G-2I**), and associations to the cell wall through Hechtian strands (**Figures 2J-2L**).

Given that SYT1, SYT5, and CLB1 have similar functional domains and subcellular localization, we asked whether the NaCl hypersensitivity previously described for the *syt1-2* mutant [6] was a common feature shared by the *syt5* and/or the *clb1* loss-of function mutants. To answer this question, we isolated two homozygous lines harboring T-DNA insertions in the seventh intron of the *At1g05500* locus (*syt5-1*, SALK\_036961) and the eighth intron of the *At3g61050* locus (*clb1-2*, SALK\_006298) (**Figure S2A**). Once we confirmed that *SYT5* and *CLB1* transcripts were not present by qRT-PCR (**Figure S2B**), we generated the triple *syt1-2/ syt5-1 /clb1-2* mutant and performed root elongation assays in the presence of NaCl as described in [6]. **Figure 3A** shows that, in the presence of NaCl, *syt5-1* and *clb1-2* root elongation is indistinguishable from that of the wild type (WT) and that *syt1-2* displays a hypersensitive response similar to that of the triple *syt1-2/ syt5-1 /clb1-2* mutant. Remarkably, the NaCl treatments also induced root hair polar growth defects in *syt1-2* and *syt5-1* but not *clb1-2* backgrounds. These defects characterized by root hair skewing and branching, were more severe in the triple *syt1-2/ syt5-1 /clb1-2* mutant (**Figure 3B**). Combined, these results suggest that SYT1 is a housekeeping gene required for proper root elongation during NaCl stress, and that the activity of additional components of the SSC complex is required for proper root hair polarization maintenance.

## **The putative SSC complex relocates in response to treatments with Rare Earth Elements**

The known effects of the *syt1-2* mutation in  $\text{Ca}^{2+}$ -regulated stress responses [6, 7, 14], the observed root hair polar growth defects that can be associated to aberrant  $[\text{Ca}^{2+}]_{\text{cyt}}$  oscillations [36], and the identification of a highly conserved  $\text{Ca}^{2+}$  binding site in SYT1, SYT5 and CLB1 (Figure 1D-1F insets) prompted us to ask whether  $\text{Ca}^{2+}$  signals could influence the localization and dynamics of the SSC complex and induce changes in EPCS organization. To address this question, we first analyzed the effect of extracellular  $\text{Ca}^{2+}$  depletion on SYT1-GFP, SYT5-GFP and CLB1-GFP localization using the extracellular  $\text{Ca}^{2+}$  chelating agents ethylene glycol-bis( $\beta$ -aminoethylether) - N,N,N',N'-tetraacetic acid (EGTA) and bis-(*o*-aminophenoxy) ethane-*N,N,N',N'*-tetraacetic acid (BAPTA) [37, 38]. Our results show that the long-term depletion of free apoplastic  $\text{Ca}^{2+}$  induced by either EGTA or BAPTA did not have a significant effect in the number of SYT1-GFP, SYT5-GFP labelled “beads” at the cell cortex, and did not induce gross morphological changes in the cER as indicated by the GFP-HDEL marker (Figures 4A-4I and Figures 4P-4R). In sharp contrast, the blockage of  $\text{Ca}^{2+}$  entry using the Rare Earth Elements (REEs)  $\text{La}^{3+}$  and  $\text{Gd}^{3+}$  as non-selective cation channel blockers [39-42] induced severe changes in both the localization and abundance of components of the SSC complex (Figures 4J – 4O). Treatments with REEs caused a 4 to 5 fold increase in the number of SYT1-GFP and SYT5-GFP labelled “beads” at the cell cortex (Figures 4P-4Q), which likely represent newly established EPCS, as indicated by the increase in the number of beads labelled by the artificial EPCS marker MAPPER-GFP [8] (Figure S3). This increase in EPCS number was accompanied by cER rearrangements characterized by a significant reduction of the average reticule size of the cER network (Figure 4R). Remarkably, treatments with EGTA and BAPTA did not change the abundance and distribution of the CLB1-GFP marker (Figures S4A-S4C), but treatments with REEs often caused a significant reduction in the CLB1-GFP fluorescent signal that hindered our ability to further analyze the subsequent CLB1 responses (Figures S4D-S4E).

**REE-endocytosis activates  $\text{Ca}^{2+}$  signaling and induces cytoskeleton-dependent changes in SYT1-GFP and SYT5-GFP localization**



Previous reports have shown that long-term treatments with REEs induce endocytosis and promote the release of REEs to the cytosol [43, 44], so we asked whether REE-endocytosis underlies the observed changes in SYT1-GFP and SYT5-GFP localization following such a treatment. **Figures 5A-5C** show that the REE treatments promote the accumulation and internalization of phosphatidylinositol-4-phosphate (PI4P) containing-vesicles, as indicated by the ratiometric sensor citrine 1xPH<sup>FAPP1</sup> [45]. These vesicles are likely to be endocytic as indicated by their co-localization with the FM4-64 dye in short-term (3 minutes) treatments (**Figure S5**). In agreement with chemical studies showing that REEs form stable complexes with polydentate chelators [46], the addition of EGTA to growth media was sufficient to inhibit the REE-induced endocytosis (**Figures 5D-5F and Figure 5G**), reverse the SYT1-GFP localization changes associated to REE internalization (**Figure S6**), and reduce the overall REE toxicity in long-term treated seedlings (**Figure S7**). To understand the mechanisms underlying the change in SYT1-GFP and SYT5-GFP localization in response to REE-induced endocytosis, we assessed whether endocytosed REEs could act as Ca<sup>2+</sup> surrogates by activating Ca<sup>2+</sup> signaling in the cytosol. To answer this question, we analyzed the effect of endocytosed REEs in the activity of the calmodulin-based ratiometric Ca<sup>2+</sup> sensor GCaMP3 [26]. **Figures 5H-5M and Figure 5N** show that long-term REE treatments (16 h) induced a 2-3 fold increase in the GCaMP3 sensor signal that was abolished by the addition of the extracellular chelator EGTA. This result confirms previous biochemical and physiological studies showing that REEs can interact with Calmodulins [47-49].

Because the delivery of SYT1-GFP to EPCS is cytoskeleton dependent but its rearrangement in response to NaCl is cytoskeleton independent [8], we asked whether the actin cytoskeleton and/or the microtubule network play a role in the REE-induced SYT1-GFP and SYT5-GFP relocation process. **Figure S8** shows that, different than the previously described NaCl treatment [8], the treatment with LaCl<sub>3</sub> induces SYT1-GFP and SYT5-GFP relocation without visible disruption of the cortical cytoskeleton organization. Furthermore, our results show that the effect of LaCl<sub>3</sub> in SYT1-GFP and SYT5-GFP localization is partially abolished by pre-treatments with the cytoskeleton depolymerizing drugs Oryzalin and Latrunculin B (**Figure 6**). Together,



these results suggest that a cytoskeleton-dependent remodeling mechanism underlies the changes in SYT1-GFP and SYT5-GFP localization in response to  $\text{LaCl}_3$  treatments (Figure 7).

## Discussion

### Endocytosed REEs as regulators of ER-PM communication

$\text{Ca}^{2+}$  is an ubiquitous intracellular secondary messenger involved in many eukaryotic signal transduction pathways [50-52]. As high  $[\text{Ca}^{2+}]_{\text{cyt}}$  generates toxic intermediates, eukaryotic cells actively compartmentalize  $\text{Ca}^{2+}_{\text{cyt}}$  to different organelles and the extracellular space [53]. In plants, this process creates up to 10,000-fold  $[\text{Ca}^{2+}]$  differences between the cytoplasm (100 nM) and the apoplast (1 mM), which enables the generation of  $\text{Ca}^{2+}$  signatures that provide specificity to responses to abiotic, biotic, and developmental stimuli [54-57]. Despite the essential role of  $\text{Ca}^{2+}$  signatures as triggers of signaling cascades, little is known about the elements that regulate the spatio-temporal distribution of  $\text{Ca}^{2+}$  sensors in plants. Indeed, most of the current information available in plants has been inferred from other eukaryotic systems with very different toolkits of  $\text{Ca}^{2+}$  channels, transporters, and signaling components [58]. In this study, we identify structural and functional similarities between mammalian and plant EPCS tethers, but we also uncover important functional and mechanistic differences of the  $\text{Ca}^{2+}$  responses mediated by them. Thus, mammalian E-Syts and the plant SSC complex share a common basic organization as both could potentially establish homotypic and heterotypic complexes with their N-terminal domains anchored to the ER, and their C-terminal C2 domains establishing  $\text{Ca}^{2+}$ -dependent interactions with the PM [28]. E-Syts and the SSC complex differ, however, in the number of predicted  $\text{Ca}^{2+}$ -

responsive C2 domains (two C2s in E-Syt1 [59], and one C2 in the SSC components), and in their noticeably different responses to changes in  $[Ca^{2+}]_{cyt}$ . In mammals, E-Syt1 aggregates and concentrates at membrane junctions following a rise in  $[Ca^{2+}]_{cyt}$  [28]. However, in Arabidopsis, a similar behavior is observed when PM  $Ca^{2+}$  channel blockers [39-42] /endocytosis inducers [43, 44] are used. This differential behavior is difficult to reconcile unless endocytosed REEs were able to trigger intracellular  $Ca^{2+}$  signals, effectively offsetting their effect as PM  $Ca^{2+}$  channel blockers. Since REEs are internalized via endocytosis upon long-term treatments, and REEs are known to act as allosteric regulators of the activity of Calmodulins [47] and C2 containing proteins [60], we propose that endocytosed REEs promote changes in ER-PM communication by either activating Calmodulin signaling or through direct binding to the SSC complex  $Ca^{2+}$ -binding domains. Still, it is unclear whether EPCS microdomains have an active role in REE endocytosis, following the models proposed in [61, 62], and which molecular components confer specificity to the EPCS tethers' responses. Given the growing number of EPCS components, Calmodulins, and C2 containing proteins described in Arabidopsis, the elucidation of specific mechanisms underlying REE-induced EPCS reorganization will likely require genetic strategies, such as REEs-resistance screens and/or mutant analyses beyond the scope of this study.

Another functional difference between mammalian E-Syts and plant SYTs is the temporal regulation of their  $Ca^{2+}$ -mediated responses. In non-excitable mammalian cells, EPCS control intracellular  $Ca^{2+}$  levels using store-operated  $Ca^{2+}$  entry (SOCE), a fast process that couples the  $Ca^{2+}$  influx from the extracellular space to the cytosolic  $Ca^{2+}$  release from the ER within seconds [63]. These mammalian cells can also sense high  $[Ca^{2+}]_{cyt}$  and trigger the recruitment, within minutes, of E-Syt1 tethers to SOCE-independent EPCS [64]. In contrast, plants lack clear orthologues of the mammalian SOCE components [58, 65], the SYT1-GFP and SYT5-GFP localization changes in response to  $LaCl_3$  occur within hours, and the  $Ca^{2+}$ -dependent susceptibility to NaCl and cold stresses is observed days after the stress application [6, 14]. Based on these observations, we hypothesize that the plant SSC complex is neither involved in the fast coupling of the extracellular and ER-lumen  $Ca^{2+}$  stores nor in the fast responses to  $[Ca^{2+}]_{cyt}$  changes. Instead, we propose that the observed SSC remodeling in response

to REEs are a consequence of the sensing and transduction of sustained  $\text{Ca}^{2+}$  stress signals that induce long-term cellular adaptive responses, such as the changes in the PM lipid composition previously described for NaCl in [8], and those observed upon REE treatments in this study. Whether the loss of CLB1-GFP signal in response to REEs is a biological consequence of the rearrangement of the SSC complex, or an artifact due to overexpression of CLB1-GFP in a WT background is currently under evaluation.

## **Stress-specific regulatory mechanisms controlling S-EPCS organization in Arabidopsis.**

The cortical ER is a complex arrangement of tubules and small cisternae distributed towards the PM [66-68]. EPCS are important substructures within the cER that can be defined as 200-300 nm long and 30 nm in wide cER nanodomains, which anchor to the PM using specialized tethering complexes [69]. In a differentiated plant cell, EPCS can be localized in immobile ER tubules [70] and are associated with cortical microtubules [7, 15, 16, 71] and the filamentous actin-myosin system [8]. Currently, two complementary functions for the cortical cytoskeleton array in EPCS establishment have been proposed. On the one hand, the actin and microtubule networks physically interact with VAP27/NET3C tethering complexes fixing them on specific positions within the cell cortex [15], and this interaction might be required for cargo exchange during endocytic and exocytic trafficking [16, 71]. On the other hand, the docking of SYT1-labeled and VAP27-labeled EPCS tethers occurs in microtubule-depleted regions, due in part to the spatial incompatibility between the diameter of microtubules ( $\approx 25\text{nm}$ ) and the estimated cytosolic gap between the ER and PM at plant, yeast, and mammalian EPCS ( $\approx 30\text{ nm}$ ) [69, 72]. In this report, we identify new commonalities between SYTs and VAP27/NET3C complexes by showing that the SSC complex requires a functional cortical cytoskeleton for proper reorganization in response to REEs. Under these conditions, the SSC and VAP27 complexes could contribute to the overall cER structure and stability by promoting cytoskeleton-dependent EPCS rearrangements in a process

likely mediated by  $\text{Ca}^{2+}$  signals. In this model, the SSC and VAP27 complexes would be enriched, and in close proximity, to regions where the cortical microtubules intersect with the cortical ER–actin network, and the  $\text{Ca}^{2+}$  and cytoskeleton dependency of the EPCS remodeling would enable the integration of cytoskeleton dynamics with the cER to PM communication required to withstand stress. In response to environmental conditions that induce cytoskeleton disassembly and reorganization (e.g NaCl), an alternative phosphoinositide-associated mechanism would promote cytoskeleton-independent EPCS remodeling and regulate the extent of the cER-PM interaction [8] (Figure 7). Together, these examples illustrate the plasticity that governs cER-PM communication, an evolutionary milestone of eukaryotic organisms in their adaptation to environmental stresses.

## Materials and Methods

### Plant materials and growth conditions

*Arabidopsis thaliana* Columbia (Col-0) was used as the wild type and the background for transgenes. Seeds of the mutant alleles *sy5-1* (SALK\_036961) and *clb1-2* (SALK\_006298) were obtained from the Arabidopsis Biological Resource Center (Ohio State University). Previously published lines in this study are SYT1-GFP [8], GFP-HDEL [73]. Plants were grown on half-strength Murashige and Skoog (MS) media (Caisson Labs) or soil (Sunshine mix #4, Sun Gro Horticulture Canada Ltd.) at 22°C with a 16-h light/8-h dark cycle. For the NaCl assays *Arabidopsis* seedlings were grown vertically for 4 d on one tenth-strength MS medium and similar size seedlings were transferred to the same media supplemented with different NaCl concentrations. The root elongation and root hair phenotypes were scored after 9 d.

### Co-immunoprecipitation and large-scale IP for LC-MS/MS

Large-scale immunoprecipitation assays for LC-MS/MS were performed as described before [74], using 5-8 g of 10 day-old Arabidopsis seedlings expressing *p35S::GFP* [75] or *pSYT1::SYT1-GFP* [8]. For targeted co-IPs, 1 g of 10 day-old Arabidopsis seedlings was frozen in liquid nitrogen. Arabidopsis stable transgenic lines expressing *p35S::GFP* (control), *pUB10::CLB1-GFP*, and *pSYT5::SYT5-GFP* were used. Total proteins were extracted and immunoprecipitation was performed with GFP-trap beads (Chromotek, Planegg-Martinsried, Germany). Proteins were stripped from the beads by boiling in 50 µl SDS loading buffer for 10 mins. Immunoprecipitated proteins were separated on SDS-PAGE acrylamide gels and western

blots were performed using anti-GFP (Santa Cruz Biotechnology sc-9996), anti-SYT1 [7], anti-Mouse IgG-Peroxidase (Sigma A9044), and anti-Rabbit IgG-Peroxidase (Sigma A0545).

### Molecular cloning and generation of transgenic plants

The *CLB1* and *SYT5* constructs used in this study were generated via PCR amplification using the RT-PCR product or genomic DNA as a template and gene specific primers, followed by cloning PCR products into *pENTR/TOPO* (Invitrogen, Carlsbad, CA) or *pDONR221*. To generate the *pUB10::CLB1-GFP* construct the *CLB1* fragment was subcloned into the *pB7m24GW,3* vector that contains a 615bp *UBQ10* promoter. To generate the *proSYT5::SYT5-GFP* construct, *pEN-L4-proSYT5-R1* and *pEN-L1-SYT5 genomic-L2* and *pEN-R2-C-GFP-L3* [76] were recombined into *pK7m34GW,0* [77] vector. To generate the *pCLB1::CLB1-GFP* construct the *CLB1 pENTR* clon was recombined with the destination binary vector *pGWB4*. All resulting expression vectors were transformed in *Arabidopsis* via floral dip [78]. The selection of transgenic lines was made on half-strength MS medium containing 25 µg/ml hygromycin (*pGWB4*) or 15 µg/ml glufosinate-ammonium (Sigma-Aldrich) (*pB7m24GW,3*).

### Chemical Applications

Chemicals were exogenously applied by incubating 5-d-old seedlings in liquid one-tenth-strength of MS medium and supplementing them with 500 µM  $\text{LaCl}_3$  (Sigma-Aldrich), 500 µM  $\text{GdCl}_3$  (Sigma-Aldrich), 5 mM EGTA (Sigma-Aldrich), or 25 µM Oryzalin (Sigma-Aldrich) for 16 h, or with 250µM bis-(*o*-aminophenoxy) ethane-*N, N, N', N'*-tetra-acetic acid (BAPTA) (Sigma-Aldrich), or 1 µM Latrunculin B (Abcam) for 2 h. The length of the treatments was based on the general toxicity caused by the different chemical compounds in plants.

### Microscopy

#### Image acquisition and quantitative analyses

Living cell images were obtained using a Nikon C1 confocal laser scanning microscope, a Perkin-Elmer spinning disk confocal microscope, and an Olympus FV1000 multiphoton confocal laser scanning microscope. The Nikon C1 confocal laser scanning microscope was equipped with 488 and 515/30nm emission filter and Nikon Plan Apochromat oil immersion objectives (40 x 1.0 NA and 60 x 1.4 NA, respectively). The Perkin Elmer spinning disk confocal microscope was equipped with 488 and 561 nm lasers. The Olympus FV1000 was equipped with 405, 473 and 559 nm lasers and a 60x oil Planon (60 x 1.4 NA). Images were captured using Nikon-EZ C1, Olympus FV1000 and Volocity software, respectively. To quantify the number of “beads” configuration five-day-old *Arabidopsis* seedlings harboring the *SYT1-GFP* or *SYT5-GFP* marker

were incubated for 16 h in liquid 1/10-strength MS medium (Mock) or liquid 1/10-strength MS medium supplemented with the different chemicals. For each treatment the number of “beads” labelled by SYT1-GFP or SYT5-GFP in the cortex of cotyledon epidermal cells was scored in at least 50 (15  $\mu\text{m} \times 15 \mu\text{m}$ ) regions of interest (ROIs) using the cell counter tool of Fiji (ImageJ) (National Institutes of Health, <http://imagej.nih.gov/ij/>) [79]. To compare the fluorescent intensity of the ratiometric CITRINE-1 $\times$ PH<sup>FAPP</sup> between control and treated-samples, confocal laser scanning images of 5-d-old epidermal cotyledon cells were acquired from at least 10 individual seedlings. For each data point the fluorescence intensity data was scored from at least 100 (15  $\mu\text{m} \times 15 \mu\text{m}$ ) ROIs using the integrated density measurement tool of Fiji [79]. In this analysis stomatal lineage cells were excluded from the quantification. To compare the fluorescent intensity of the ratiometric GCaMP3 sensor, images of 5-d-old seedlings were acquired using a Nikon stereo microscope SMZ18 equipped with 480/40nm excitation filter, Nikon P2-SHR Plan Apo 0.5x objective and Nikon DS-Ri2 camera. The images were captured using NIS-Elements BR software version 4.60. For each data point the fluorescence intensity data was scored from at least 50 seedlings. In the ratiometric analyses the fluorescent data was normalized using the equation:  $\Delta F/F = (F - F_0)/F_0$ , where  $F_0$  is the mean intensity of background fluorescence. The data was subject to one way ANOVA analyses to identify statistical differences among treatments. All statistical analyses were performed using the GraphPad Prism 5.0b software.

## Accession numbers

The Arabidopsis Genome Initiative locus identifiers for genes used in this article are SYT1 (*At2g20990*), SYT5 (*At1g05500*), and CLB1 (*At3g61050*).

## Acknowledgements

This research was undertaken thanks to funding from the NSERC Discovery Grant RGPIN-2019-05568, the Canada Research Chairs program (to A.R.) and the Coordenação de Aperfeiçoamento de Pessoal de Nível Superior – Brasil (CAPES 88881.189854/2018-01, to B.S.).



## References

1. McAinsh, M. R., and Pittman, J. K. (2009). Shaping the calcium signature. *New Phytol.* 181, 275–2
2. Schrader, M. et al. (2015) The different facets of organelle interplay—an overview of organelle interactions *Frontiers in Cell and Developmental Biology.* 3: 56.
3. Prinz, W.A (2014) Bridging the gap: membrane contact sites in signaling, metabolism, and organelle dynamics. *J. Cell Biol.* 205: 759–769.
4. Phillips, MJ and Voeltz, GK (2016) Structure and function of ER membrane contact sites with other organelles. *Nature Reviews Molecular Cell Biology.* 17: 69–82
5. Bayer EM. et al. (2017) From shaping organelles to signalling platforms: the emerging functions of plant ER-PM contact sites. *Curr.Opin. Plant. Biol.* 40: 1-8
6. Schapire AL. et al. (2008) Arabidopsis synaptotagmin 1 is required for the maintenance of plasma membrane integrity and cell viability. *Plant Cell.* 20: 3374-3388.
7. Pérez-Sancho J. et al. (2015) The Arabidopsis synaptotagmin1 is enriched in endoplasmic reticulum-plasma membrane contact sites and confers cellular resistance to mechanical stresses. *Plant Physiol.* 168: 132–143.
8. Lee E, Vanneste S, Pérez-Sancho J, Benitez-Fuente F, Strelau M, Macho AP, Botella MA, Friml J, Rosado A (2019). Ionic stress enhances ER-PM connectivity via phosphoinositide-associated SYT1 contact site expansion in Arabidopsis. *Proc. Natl. Acad. Sci. USA.* 116:1420-1429.
9. Kim, H. et al. (2016) Synaptotagmin 1 negatively controls the two distinct immune secretory pathways to powdery mildew fungi in Arabidopsis. *Plant Cell Physiol.* 57: 1133-1141.
10. Uchiyama A. et al. (2014) The Arabidopsis synaptotagmin SYTA regulates the cell-to-cell movement of diverse plant viruses. *Front. Plant Sci.* 5: 584.
11. Levy A. et al. (2015) Synaptotagmin SYTA Forms ER-Plasma Membrane Junctions that Are Recruited to Plasmodesmata for Plant Virus Movement. *Curr. Biol.* 25: 2018–2025.

12. Lewis JD and Lazarowitz SG (2010) Arabidopsis synaptotagmin SYTA regulates endocytosis and virus movement protein cell-to-cell transport. *Proc. Natl. Acad. Sci. U. S. A.* 107: 2491–2496.
13. Siao, W. et al. (2016) Arabidopsis SYT1 maintains stability of cortical endoplasmic reticulum networks and VAP27-1-enriched endoplasmic reticulum–plasma membrane contact sites. *J. Exp. Bot.* doi: 10.1093/jxb/erw381
14. Yamazaki T. et al. (2008) Calcium-Dependent Freezing Tolerance in Arabidopsis Involves Membrane Resealing via Synaptotagmin SYT1. *Plant Cell.* 20: 3389–3404.
15. Wang, P. et al. (2016) Plant VAP27 proteins: domain characterization, intracellular localization and role in plant development. *New Phytol.* 210: 1311–1326.
16. Wang, P. et al. (2014) The plant cytoskeleton, NET3C, and VAP27 mediate the link between the plasma membrane and endoplasmic reticulum. *Curr. Biol.* 24: 1397–1405.
17. Ho, C.M. et al. (2016) Modulators of Stomatal Lineage Signal Transduction Alter Membrane Contact Sites and Reveal Specialization among ERECTA Kinases. *Dev. Cell.* 38: 345–357.
18. Craxton, M. (2007) Evolutionary genomics of plant genes encoding N-terminal–TM–C2 domain proteins and the similar FAM62 genes and synaptotagmin genes of metazoans. *BMC Genomics.* 8: 25.
19. Toulmay, A and Prinz W.A (2012) A conserved membrane-binding domain targets proteins to organelle contact sites. *J. Cell Sci.* 125: 49–58.
20. Pérez-Sancho, J. et al. (2016) Analysis of protein–lipid Interactions using purified C2 domains. *Methods Mol. Biol.* 1363: 175–187.
21. Yamazaki et al. (2010) Arabidopsis synaptotagmin SYT1, a type I signal-anchor protein, requires tandem C2 domains for delivery to the plasma membrane. *J. Biol. Chem.* 285: 23163–23174.
22. Pérez-Sancho, J et al. (2016) Stitching Organelles: Organization and Function of Specialized Membrane Contact Sites in Plants. *Trends in Cell Biol.* 26: 705–717.
23. Tilsner J. et al. (2016) Staying Tight: Plasmodesmal Membrane Contact Sites and the Control of Cell-to-Cell Connectivity in Plants. *Annu. Rev. Plant Biol.* 67: 337–364.
24. Dalal, J. et al. (2016) ROSY1, a novel regulator of gravitropic response is a stigmasterol binding protein. *J. Plant Physiol.* 196–197: 28–40.
25. Kriechbaumer, V. et al. (2015) Reticulomics: protein-protein interaction studies with two plasmodesmata-localized reticulon family proteins identify binding partners enriched at plasmodesmata, endoplasmic reticulum, and the plasma membrane. *Plant Physiol.* 169: 1933–1945.
26. Tian, L. et al., (2009) Imaging neural activity in worms, flies and mice with improved GCaMP calcium indicators. *Nat. Methods* 6, 875–881.
27. Creutz et al. (2004) Characterization of the yeast tricalbins: membrane-bound multi-C2-domain proteins that form complexes involved in membrane trafficking. *Cell. Mol. Life Sci.* 61: 1208–1220.
28. Giordano, F. et al. (2013) PI (4,5) P<sub>2</sub>-Dependent and Ca<sup>2+</sup>-regulated ER-PM interactions mediated by the extended synaptotagmins. *Cell.* 153: 1494–1509.

29. Brault, ML. et al. (2019). Multiple C2 domains and transmembrane region proteins (MCTPs) tether membranes at plasmodesmata. doi: 10.15252/embr.201847182.
30. de Silva, K. et al., (2011) Arabidopsis thaliana calcium-dependent lipid-binding protein (AtCLB): a novel repressor of abiotic stress response. J Exp Bot. 62:2679-89.
31. Klepikova AV, et al., (2016) A high resolution map of the Arabidopsis thaliana developmental transcriptome based on RNA-seq profiling. Plant J. 88: 1058-1070.
32. El-Gebali, S. et al., (2019) The Pfam protein families database in 2019 doi: 10.1093/nar/gky995.
33. Krogh, A. et al., (2001). Predicting transmembrane protein topology with a hidden Markov model: application to complete genomes. J. Mol. Biol. 305: 567–580.
34. Kelley, LA. et al. (2015) The Phyre2 web portal for protein modeling, prediction and analysis. Nature Protocols. 10: 845-858.
35. Wass, MN. et al., (2010) 3DLigandSite: predicting ligand-binding sites using similar structures. NAR 38 Suppl:W469-73.
36. Brost, C. et al. (2019) Multiple cyclic nucleotide-gated channels coordinate calcium oscillations and polar growth of root hairs. Plant J. doi: 10.1111/tpj.14371.
37. Nakagawa, Y. et al. (2007) Arabidopsis plasma membrane protein crucial for Ca<sup>2+</sup> influx and touch sensing in roots. Proc. Natl. Acad. Sci. USA. 104: 3639-3644.
38. Brault, M. Et al. (2004) Plasma Membrane Depolarization Induced by Absciscic Acid in Arabidopsis Suspension Cells Involves Reduction of Proton Pumping in Addition to Anion Channel Activation, Which Are Both Ca<sup>2+</sup> Dependent. Plant Physiol. 135: 231–243
39. De Vriese, K. et al. Pharmacological Strategies for Manipulating Plant Ca<sup>2+</sup> Signalling (2018). Int J Mol Sci. 19: 1506.
40. Lansman, JB. (1990) Blockade of current through single calcium channels by trivalent lanthanide cations. Effect of ionic radius on the rates of ion entry and exit. J. Gen. Physiol. 95:679–696
41. Pidcock, E. and Moore, GR. (2001) Structural characteristics of protein binding sites for calcium and lanthanide ions. J. Biol. Inorg. Chem. 6: 479–489.
42. Yang, X and Sachs F. (1989) Block of stretch-activated ion channels in Xenopus oocytes by gadolinium and calcium ions. Science. 243:1068–1071.
43. Wang, L. et al. (2014) REEs activate endocytosis in plant cells. Proc.Natl.Acad. Sci. USA. 111: 12936-12941.
44. Wang L. et al. (2019) Arabinogalactan protein-rare earth element complexes activate plant endocytosis. Proc.Natl.Acad. Sci. USA. doi: 10.1073/pnas.1902532116.
45. Simon, ML. et al. (2016) A PtdIns(4)P-driven electrostatic field controls cell membrane identity and signalling in plants. Nat Plants. 2:16089.
46. Tei, L. et al. (2010) Dramatic increase of selectivity for Heavy Lanthanide(III) cations by tuning the flexibility of polydentate chelators. Inorg. Chem. 49: 616–625.
47. Mills, JS and Johnson JD (1985) Metal Ions as Allosteric Regulators of Calmodulin. J. Biol. Chem 260: 15100-15105.

- 1 48. Ye, Y. et al. (2005) Probing site-specific calmodulin calcium and lanthanide affinity by  
2 grafting. *J Am Chem Soc.* 127: 3743–3750
- 3 49. Bertini, I. et al., (2003) Tuning the Affinity for Lanthanides of Calcium Binding Proteins.  
4 *Biochemistry.* 42: 8011-8021.
- 5 50. Carafoli, E. and Krebs, J. J. (2016) Why Calcium? How calcium became the best  
6 communicator. *J Biol Chem.* 291: 20849-20857.
- 7 51. Plattner, H. and Verkhatsky, A. (2015) The ancient roots of calcium signalling  
8 evolutionary tree. *Cell Calcium.* 57: 123-132.
- 9 52. Kudla, J. et al. (2010) Calcium signals: the lead currency of plant information processing  
10 *Plant Cell.* 22: 541–563.
- 11 53. Case, R.M. et al. (2007) Evolution of calcium homeostasis: from birth of the first cell to  
12 an omnipresent signalling system. *Cell Calcium.* 42: 345-350.
- 13 54. Ranty, B. et al. (2016) Calcium Sensors as Key Hubs in Plant Responses to Biotic and  
14 Abiotic Stresses. *Front. Plant Sci.* 16: 7:327.
- 15 55. Zhu, X. et al. (2013) Aequorin-based luminescence imaging reveals stimulus- and tissue-  
16 specific  $\text{Ca}^{2+}$  dynamics in Arabidopsis plants. *Mol. Plant.* 6: 444-455.
- 17 56. Short, E.F. et al. (2012) A stress-specific calcium signature regulating an ozone-  
18 responsive gene expression network in Arabidopsis. *Plant J.* 71: 948-961.
- 19 57. Monshausen, G.B. et al. (2009)  $\text{Ca}^{2+}$  regulates reactive oxygen species production and  
20 pH during mechanosensing in Arabidopsis roots. *Plant Cell.* 21: 2341-2356.
- 21 58. Wheeler, G.L. and Brownlee, C.M. (2008)  $\text{Ca}^{2+}$  signalling in plants and green algae:  
22 changing channels. *Trends Plant Sci.* 13: 506–514.
- 23 59. Pérez-Lara, A. and Jahn R. (2015) Extended synaptotagmins (E-Syts): Architecture and  
24 dynamics of membrane contact sites revealed. *Proc. Natl. Acad. Sci. USA.* 112: 4837–  
25 4838.
- 26 60. Essen, LO. et al. (1997) A ternary metal binding site in the C2 domain of  
27 phosphoinositide-specific phospholipase C-delta1. *Biochemistry,* 36: 2753-2762.
- 28 61. Stefano G. et al. (2018) Plant Endocytosis Requires the ER Membrane-Anchored  
29 Proteins VAP27-1 and VAP27-3. *Cell Rep.* 23: 2299-2307.
- 30 62. Wang, P. and Hussey, PJ. (2019) Plant ER-PM Contact Sites in Endocytosis and  
31 Autophagy: Does the Local Composition of Membrane Phospholipid Play a Role?. *Front.*  
32 *Plant Sci.* <https://doi.org/10.3389/fpls.2019.00023>
- 33 63. Orci L. et al. (2009) STIM1-induced precortical and cortical subdomains of the  
34 endoplasmic reticulum. *Proc. Natl. Acad. Sci.* 106: 19358–19362.
- 35 64. Wu, M.M. et al. (2006)  $\text{Ca}^{2+}$  store depletion causes STIM1 to accumulate in ER regions  
36 closely associated with the plasma membrane. *J. Cell Biol.* 174: 803–813.
- 37 65. Idevall-Hagren, O. et al. (2015) Triggered  $\text{Ca}^{2+}$  influx is required for extended  
38 synaptotagmin 1-induced ER-plasma membrane tethering. *EMBO J.* 34: 2291–2305.
- 39 66. Stefano, G et al. (2014) ER - the key to the highway. *Curr. Opin. Plant Biol.* 22: 30-38.
- 40 67. Sparkes, I. et al. (2009) Movement and remodeling of the endoplasmic reticulum in  
41 nondividing cells of tobacco leaves. *Plant Cell.* 21: 3937–3949.

68. Griffing LR. et al. (2017) Plant ER geometry and dynamics: biophysical and cytoskeletal control during growth and biotic response. *Protoplasma*. 254: 43-56.
69. McFarlane HE. et al. (2017) Multiscale Structural Analysis of Plant ER–PM Contact Sites. *Plant Cell Physiol*. 58: 478-484.
70. Ishikawa, K. et al. Synaptotagmin-Associated Endoplasmic Reticulum-Plasma Membrane Contact Sites Are Localized to Immobile ER Tubules. *Plant Physiol*. 178: 641-653.
71. Pena, E. J. and Heinlein, M. (2013). Cortical microtubule-associated ER sites: organization centers of cell polarity and communication. *Curr. Opin. Plant Biol*. 16: 764–773.
72. Fernández-Busnadiego, R. et al. (2015) Three-dimensional architecture of extended synaptotagmin-mediated endoplasmic reticulum-plasma membrane contact sites. *Proc. Natl. Acad. Sci. USA*. 112: E2004- 2013.
73. Batoko, H. et al. (2000) A rab1 GTPase is required for transport between the endoplasmic reticulum and Golgi apparatus and for normal Golgi movement in plants. *Plant Cell*. 12: 2201–2218.
74. Kadota Y. et al. (2015) Immunoprecipitation of Plasma Membrane Receptor-Like Kinases for Identification of Phosphorylation Sites and Associated Proteins. *Methods in molecular biology* (Clifton, N.J.) 1363:133-144.
75. Wang Y. et al. (2019) The IMMUNE-ASSOCIATED NUCLEOTIDE-BINDING 9 protein is a regulator of basal immunity in *Arabidopsis thaliana*. *Mol Plant Microbe Interact*. 32: 65-75.
76. Boruc, J. et al. (2010) Systematic localization of the *Arabidopsis* core cell cycle proteins reveals novel cell division complexes. *Plant Physiol*. 152: 553–565.
77. Karimi, M. et al. (2005) Modular cloning in plant cells. *Trends Plant Sci*. 10: 103–105.
78. Clough SJ, Bent AF. (1998) Floral dip: a simplified method for *Agrobacterium*-mediated transformation of *Arabidopsis thaliana*. *Plant J*. 16: 735–743.
79. Schindelin, J. et al. (2012) Fiji: an open-source platform for biological-image analysis. *Nat. Methods*. 9: 676-682.



**A**

| Gene ID     | Protein name | GFP IP                |                                 |                       | SYT1-GFP IP           |                                 |                       |
|-------------|--------------|-----------------------|---------------------------------|-----------------------|-----------------------|---------------------------------|-----------------------|
|             |              | Total spectrum counts | Exclusive unique peptide counts | Best mascot ion score | Total spectrum counts | Exclusive unique peptide counts | Best mascot ion score |
| -           | GFP          | 459                   | 25                              | 127.6                 | 45                    | 11                              | 106.1                 |
| AT2G20990.1 | SYT1         | -                     | -                               | -                     | 62                    | 31                              | 82.4                  |
| AT1G05500.1 | SYT5         | -                     | -                               | -                     | 19                    | 11                              | 75.4                  |
| AT3G61050.1 | CLB1         | -                     | -                               | -                     | 8                     | 8                               | 56.1                  |

**B**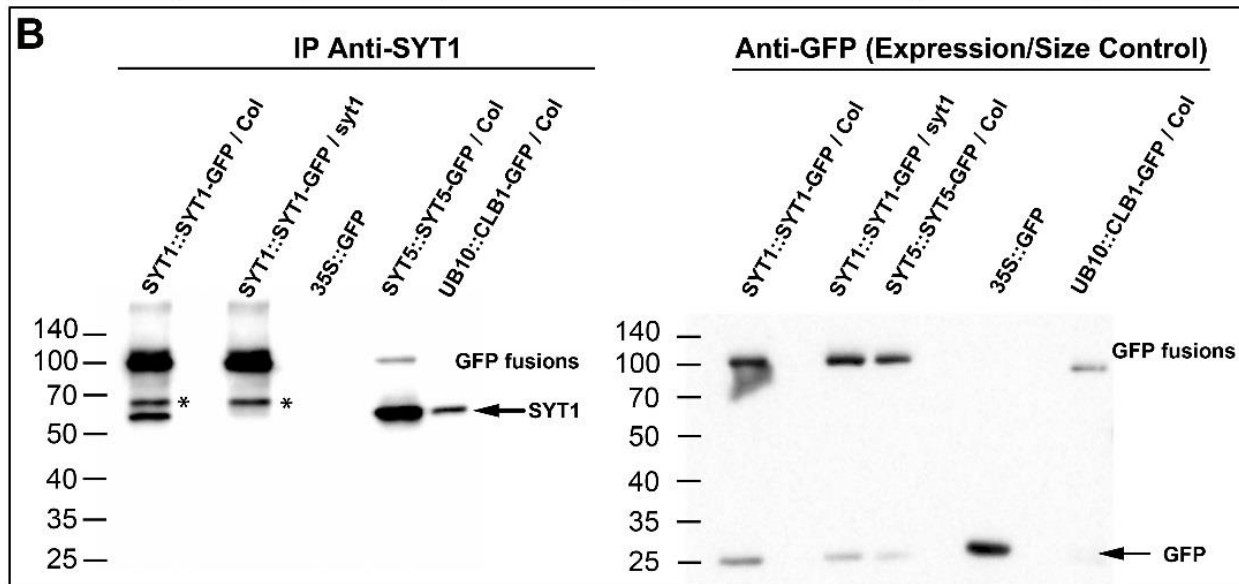**C**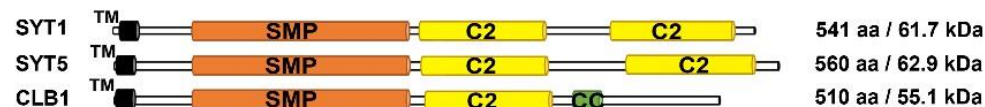**D**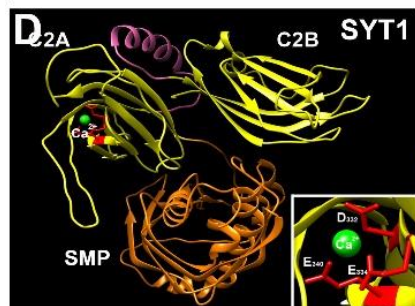**E**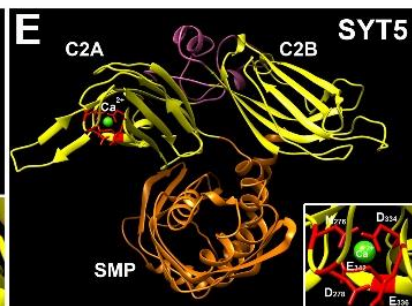**F**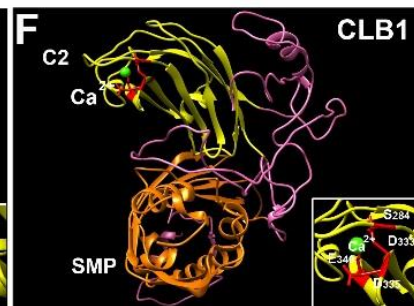



**Figure 1. The  $\text{Ca}^{2+}$ -dependent phospholipid binding proteins SYT5 and CLB1 interact with SYT1. Table 1A.** Peptide counts detected upon GFP immunoprecipitation followed by LC-MS/MS analysis using Arabidopsis plants expressing GFP (control) and SYT1-GFP. Numbers indicate the total spectrum counts corresponding to the indicated proteins, and the exclusive unique peptides represented within them. The best mascot ion score among these peptides is indicated. The number of peptides corresponding to GFP is shown for reference. This result is representative from 3 independent experiments (For details on the replicates see **Table S1**). **B)** Arabidopsis transgenic plants expressing SYT1-GFP, SYT5-GFP and CLB1-GFP were used for immunoprecipitation using GFP-trap beads. Plants expressing free GFP were used as control. The immunoprecipitated proteins were separated by SDS-PAGE, and western blots were analysed using anti-SYT1 (left panel) or anti-GFP (right panel) antibodies. Molecular weight (kDa) marker bands are indicated for reference. The arrow indicates the expected MW for SYT1.\*indicate a SYT1-GFP derived fragment recognized by the SYT1 antibody. **C)** Schematic representation of the functional domains of SYT1, SYT5 and CLB1. TM: Transmembrane Domain, SMP: synaptotagmin-like mitochondrial-lipid binding domain, C2: phospholipid binding domains, CC: Coiled coil domain. **D)** 3D structures and  $\text{Ca}^{2+}$  binding sites in the predicted cytosolic regions of SYT1, SYT5 and CLB1 identified using Phyre2 and 3DLigand site. Important aminoacid residues for  $\text{Ca}^{2+}$  binding are indicated in red.

SYT1-GFP

SYT5-GFP

CLB1-GFP

Cotyledon

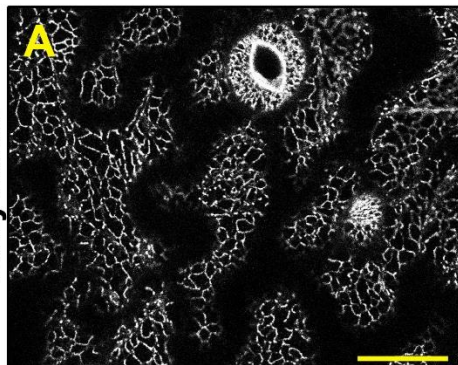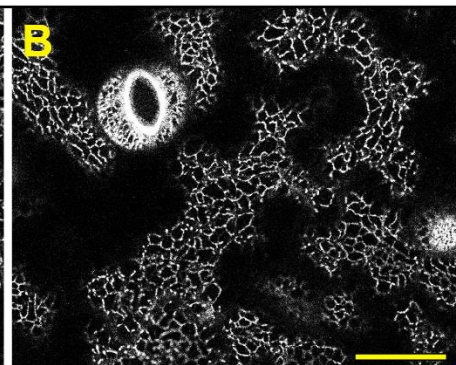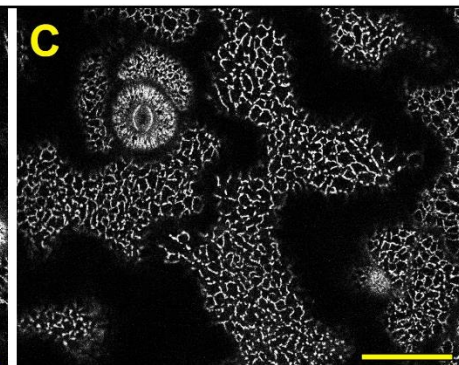

Root

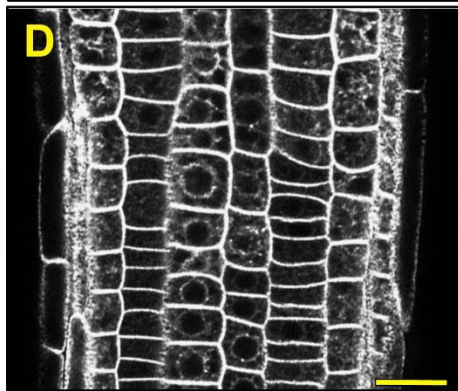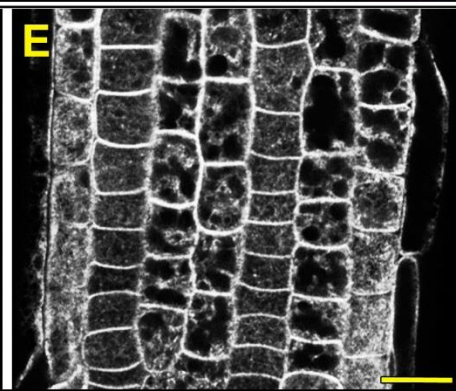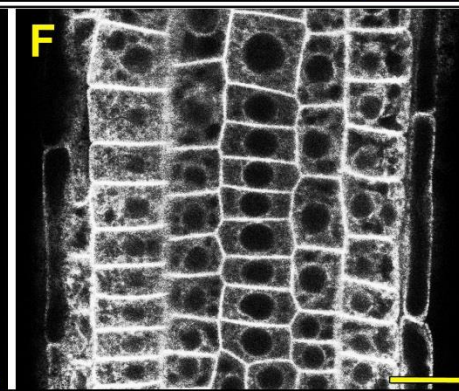

Trichoblast

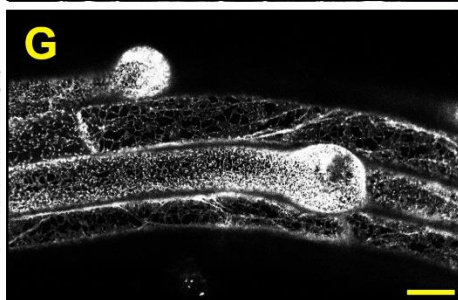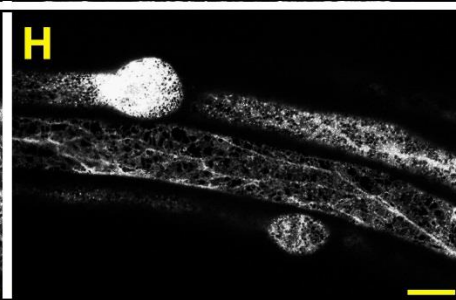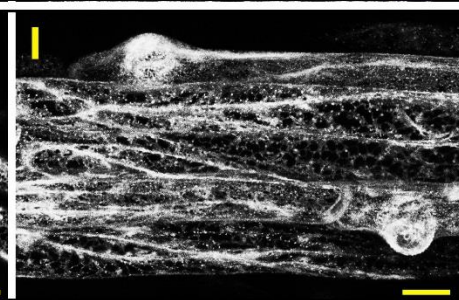

Hechtian Strand

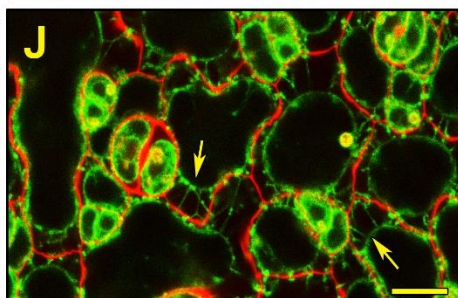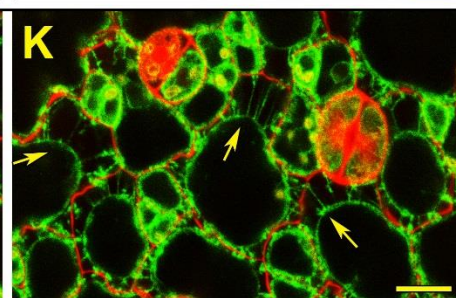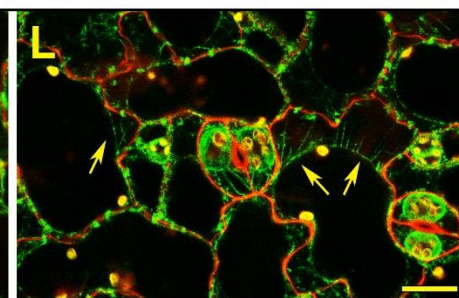

**Figure 2. Subcellular localization of the putative SYT1/SYT5/CLB1 tethering complex (A-C)** Subcellular localization of the SYT1-GFP and SYT5-GFP and CLB1-GFP markers in epidermal cells of 5-d-old cotyledons **(A-C)**, root meristematic cells of 5-d-old seedlings **(D-F)**, and emerging root hairs in 7-d-old seedlings **(G-I)** Scale bars (A-I) = 25  $\mu\text{m}$ . **(J-L)** SYT1-GFP, SYT5-GFP and CLB1-GFP are present in Hechtian strands. 5-d-old cotyledon epidermal cells expressing the different markers were plasmolyzed for 4 h using 0.4 M mannitol. The images are an overlay of propidium iodide stained cell walls with the localization of the GFP fusion proteins in green Arrows indicate Hechtian strands. Scale bar = 20  $\mu\text{m}$ .

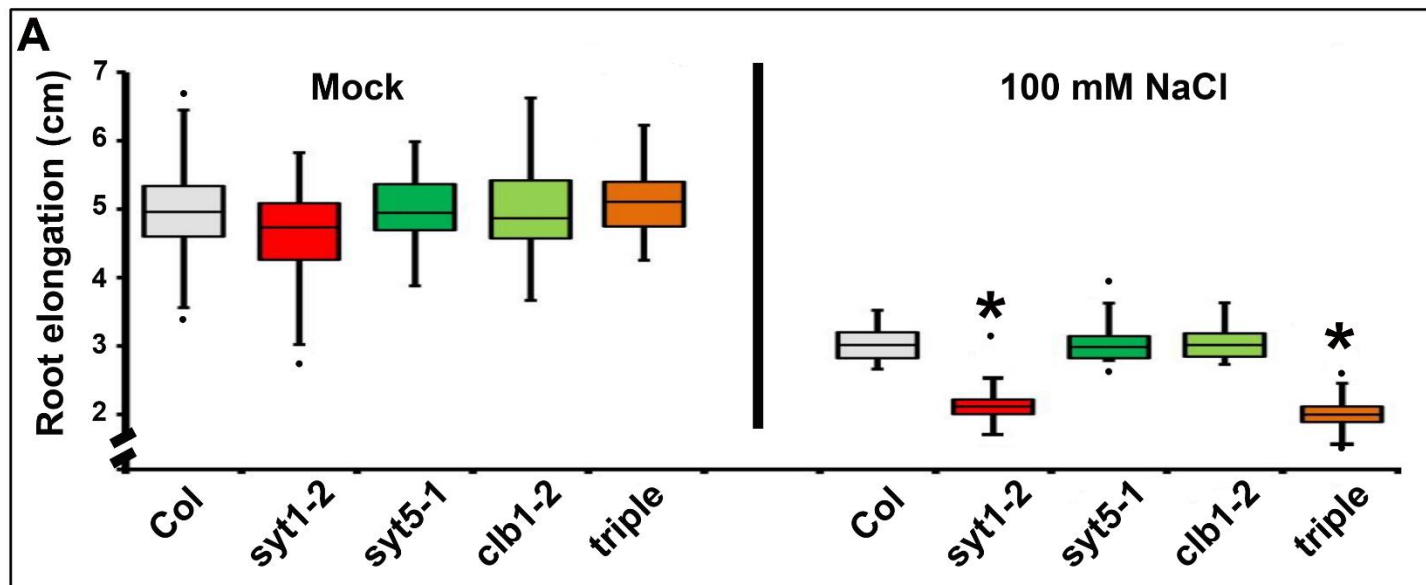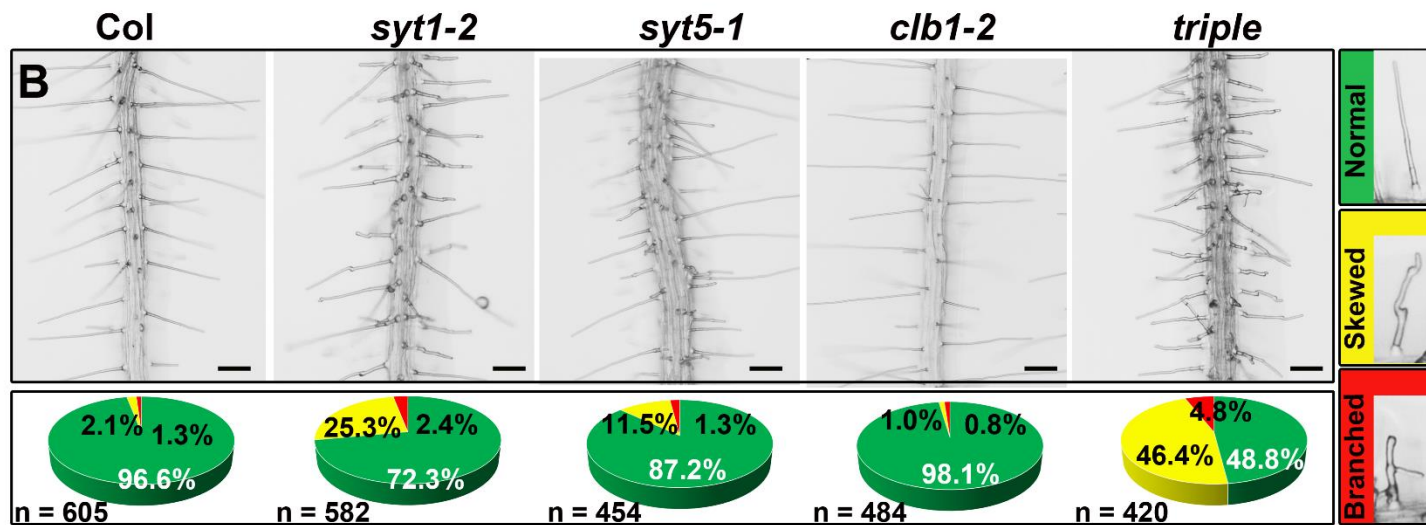

**Figure 3. Responses to NaCl stress. (A)** Root elongation NaCl dosage analysis. Seedlings were grown in one tenth-strength MS medium for 4 d and then transferred to the same media supplemented with the NaCl concentrations indicated. n = 60 seedlings / treatment. Asterisks indicate significant differences between the wild type (Col) and the mutants ( $P < 0.05$ ) **(B)** Representative roots from WT (Col), *syt1-2*, *syt5-1*, *clb1-2* single and *syt1-2 syt5-1 clb1-2* triple mutants showing the root hair morphology upon NaCl stress. *Arabidopsis* seedlings were grown vertically for 5 d on one tenth-strength MS medium supplemented with 50 mM NaCl and directly imaged on the growth media without mounting. **(C)** Quantification of root hair phenotypes. Right panels show representative root hair morphologies categorized as normal (green), skewed (yellow) or branched (red). Data represent the percentage of root hairs on each category and n represents the number of root hairs quantified for each genotype. Scale bars = 200  $\mu\text{m}$ .



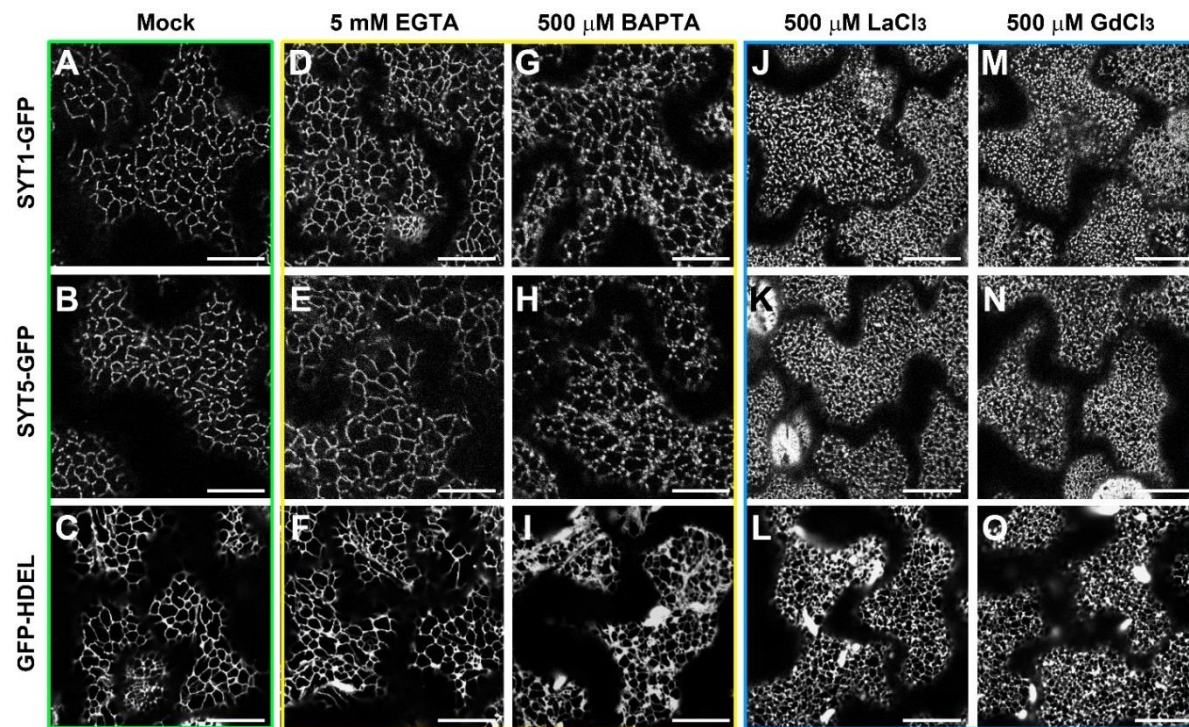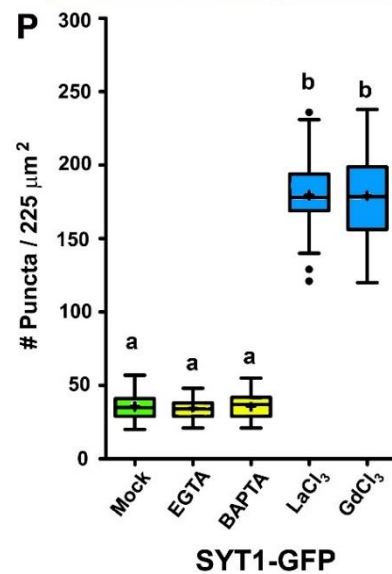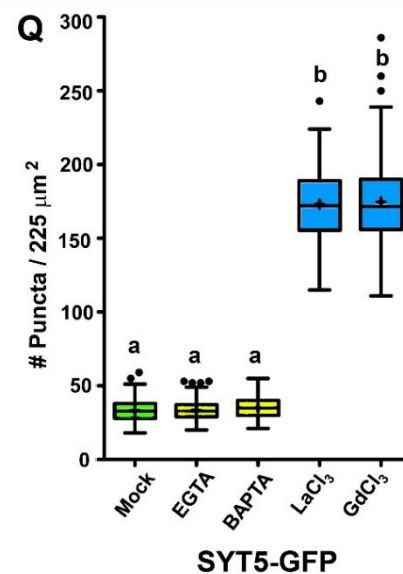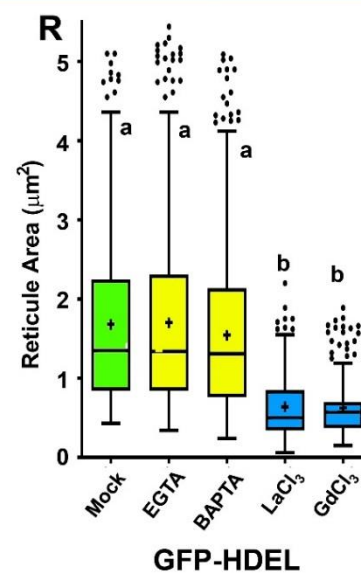



**Figure 4. Treatments with non-selective  $\text{Ca}^{2+}$  channel blockers increase the number of putative SSC complexes at the cell cortex.** 5-d-old SYT1-GFP, SYT5-GFP, and HDEL-GFP seedlings were treated in liquid 1/10 strength MS medium supplemented with Mock (**A-C**) EGTA (5 mM, 2 h) (**D-F**), BAPTA (250  $\mu\text{M}$ , 2 h) (**G-I**),  $\text{LaCl}_3$  (500  $\mu\text{M}$  / 16 h) (**J-L**) or  $\text{GdCl}_3$  (500  $\mu\text{M}$  / 16 h) (**M-O**) prior to imaging and quantification. (**P-Q**) Quantification of SYT1-GFP and SYT5-GFP puncta at the cell cortex upon chemical treatments. The number of SYT1-GFP and SYT5-GFP puncta were scored from 50-60 arbitrary 225  $\text{mm}^2$  ROIs from at least 15 cells from 5 different seedlings. **R**) Quantification of HDEL-GFP reticulation. For each treatment the number of closed reticules was scored using 50 - 60 arbitrary 225  $\text{mm}^2$  ROIs from at least 15 cells from 5 independent seedlings. In the box and whiskers plots, the center line represents the median number of closed reticules / 225  $\text{mm}^2$ , the top and bottom edges are the 25th and 75th percentiles of the distribution, and the ends of the whiskers are set at 1.5 times the IQR. When present, the minimum / maximum values outside the IQR are shown as outliers (dots). Letters indicate statistically significant differences using Tukey multiple pairwise-comparisons  $p < 0.05$  Scale bars = 20  $\mu\text{m}$

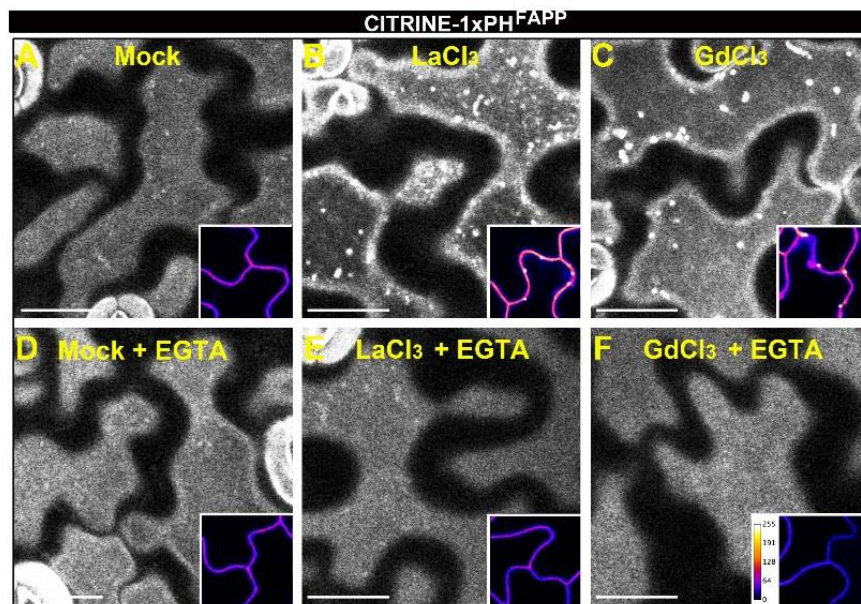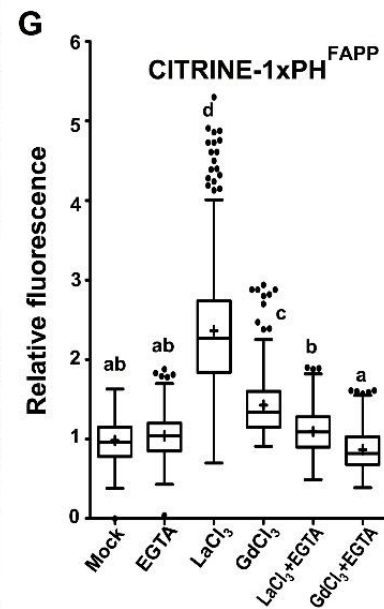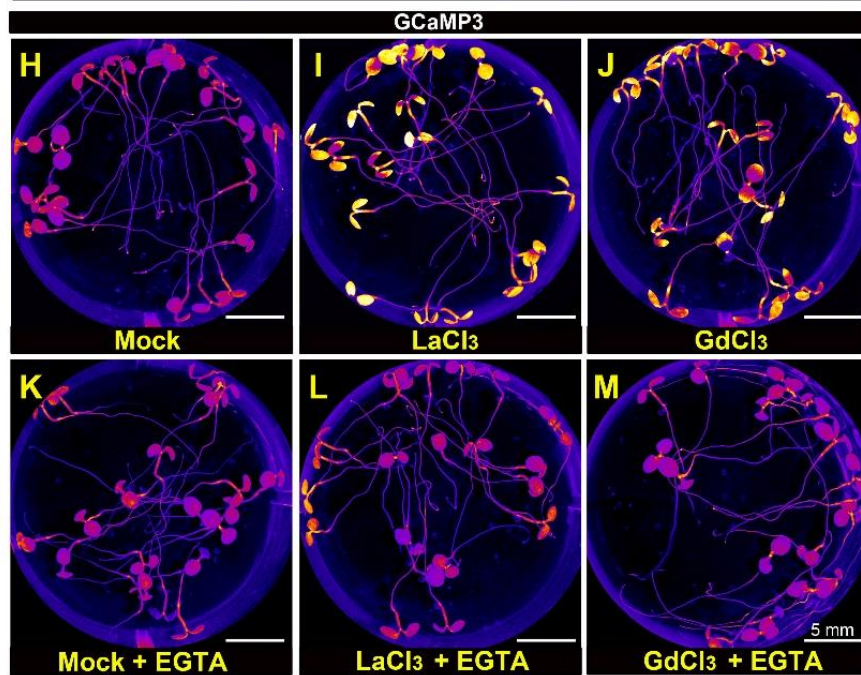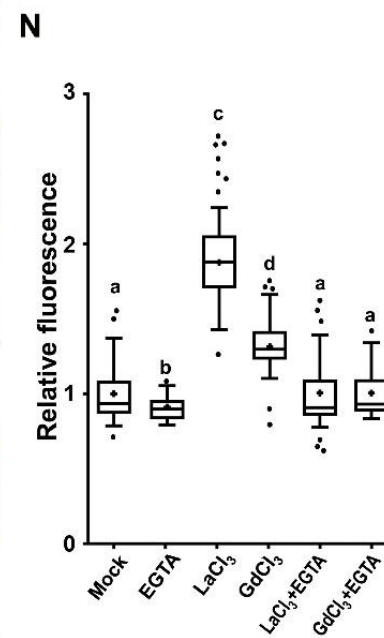

**Figure 5. REE induces the accumulation and internalization of PI4P-containing vesicles and activates the GCaMP3 sensor. (A-F)** Confocal images of the cell cortex in cotyledon epidermal cells expressing the CITRINE-1xPH<sup>FAPP</sup> marker. 5-d-old seedlings were treated in liquid one-tenth-strength MS medium supplemented with Mock, 16 h **(A)**, LaCl<sub>3</sub> (500 μM / 16 h) **(B)**, GdCl<sub>3</sub> (500 μM / 16 h) **(C)**, or the same media supplemented with 5 mM EGTA **(D-F)**. The presence of endocytic vesicles is shown as bright dots at the cell cortex, and PI4P accumulation is shown in the insets as color-coded pixel intensity following the LUT scale shown in F. **G)** Quantification of the CITRINE-tagged 1xPH<sup>FAPP</sup> signal relative to mock conditions. The letters indicate statistically significant differences using Tukey multiple pairwise-comparisons  $p < 0.05$ . Scale bars = 20 μm. **(H-M)** Fluorescence images of seedlings expressing the GCaMP3 Ca<sup>2+</sup> sensor. 5-d-old seedlings were treated in liquid one-tenth-strength MS medium supplemented with Mock, 16 h **(H)**, LaCl<sub>3</sub> (500 μM / 16 h) **(I)**, GdCl<sub>3</sub> (500 μM / 16 h) **(J)**, or the same media supplemented with 5 mM EGTA **(K-M)**. The activity of the Ca<sup>2+</sup> sensor is shown as color-coded pixel intensity following the LUT scale shown in F. **N)** Quantification of the GCaMP3 signal relative to mock conditions. Scale bars = 5 mm. In the G and N plots, the center line represents the median fluorescence intensity fold increase relative to mock, the cross represents the mean fluorescent intensity, the top and bottom edges are the 25<sup>th</sup> and 75<sup>th</sup> percentiles of the distribution, and the ends of the whiskers are set at 1.5 times the interquartile range (IQR). All values outside the IQR are shown as outliers. At least 100 regions of interest (ROIs) **(G)** or 50 seedlings **(N)** were measured for each treatment.

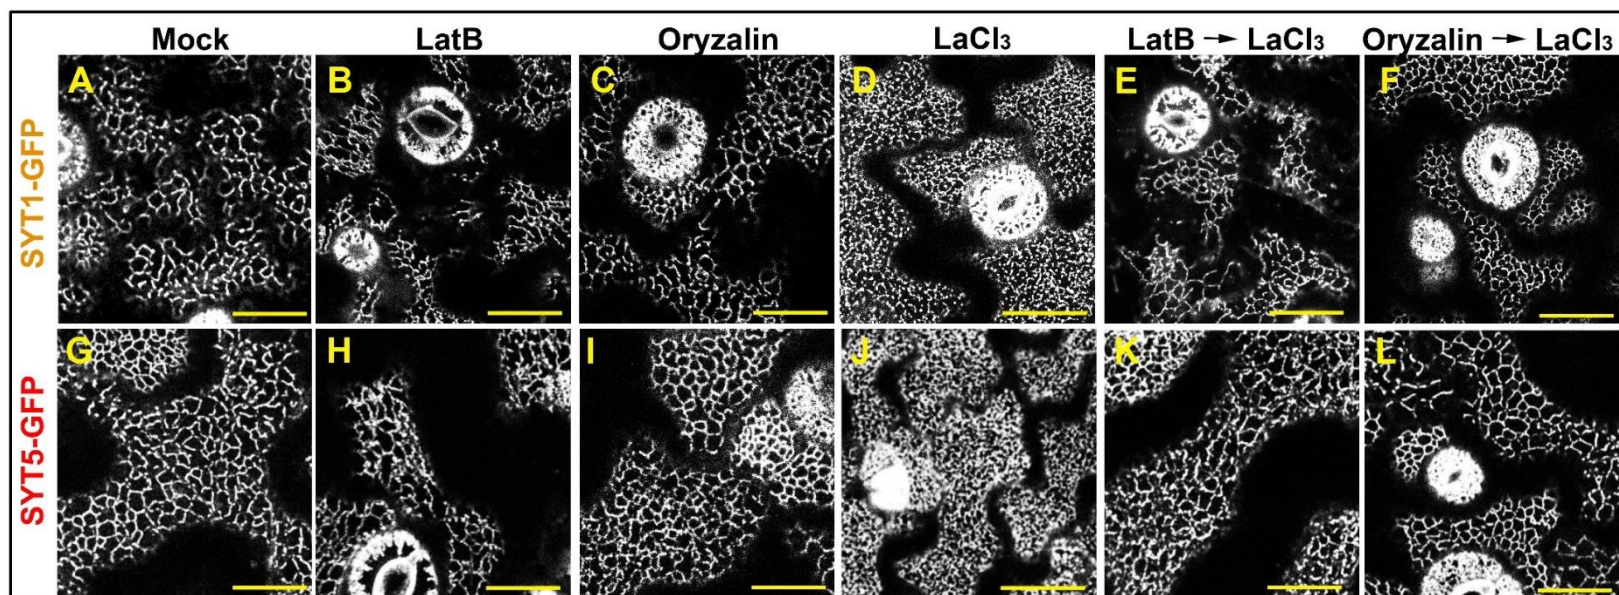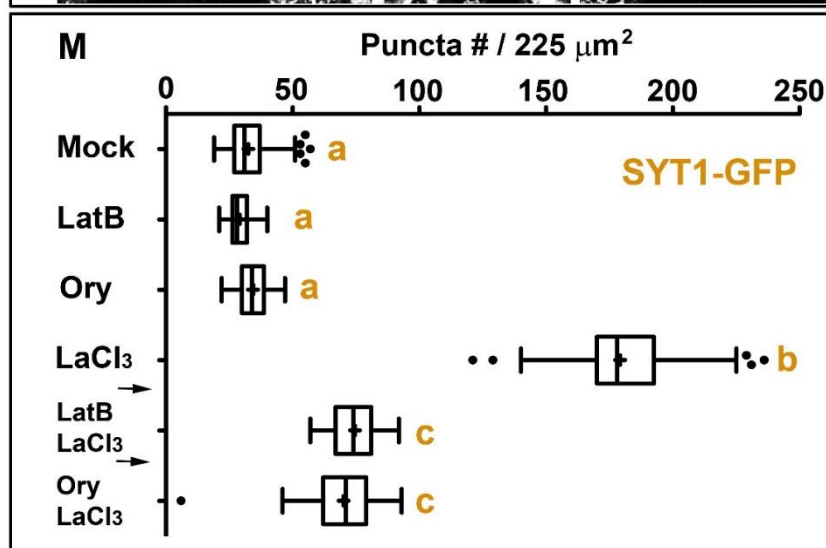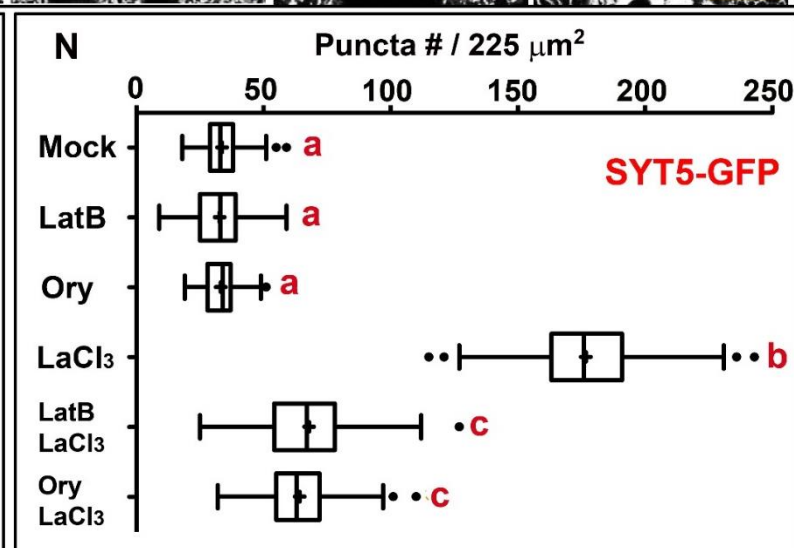

**Figure 6. REE-endocytosis induces cytoskeleton-dependent changes in EPCS configuration.** Confocal images of the cell cortex in cotyledon epidermal cells expressing the SYT1-GFP (A-F) and SYT5-GFP (G-L) markers . Five-day-old transgenic seedlings grown in one-tenth-MS were transferred to liquid one-tenth-MS, 16 h **(A and G)**, or the same media supplemented with LatB (1  $\mu$ M, 2 h) **(B and H)**, oryzalin (25  $\mu$ M, 16 h )**(C and I)**,  $\text{LaCl}_3$  ( 500 mM, 16 h) **(D and J)** or sequentially treated with LatB (1  $\mu$ M, 2 h) followed by  $\text{LaCl}_3$  ( 500 mM, 16 h) **(E and K)** or oryzalin (25  $\mu$ M, 16 h) followed by  $\text{LaCl}_3$  ( 500 mM, 16 h) **(F-L)** before imaging. **M-N)** Quantification of SYT1-GFP and SYT5-GFP puncta at the cell cortex upon chemical treatments For each treatment, the number of SYT1-GFP and SYT5-GFP puncta was scored from 50-60 arbitrary 225  $\text{mm}^2$  ROIs from at least 15 cells from 5 different seedlings. In the box and whiskers plots, the center line represents the median number of closed reticules / 225  $\text{mm}^2$ , the top and bottom edges are the 25th and 75th percentiles of the distribution, and the ends of the whiskers are set at 1.5 times the IQR. the minimum / maximum values outside the IQR are shown as outliers (dots). Letters indicate statistically significant differences using Tukey multiple pairwise-comparisons  $p < 0.05$  Scale bars = 20  $\mu$ m



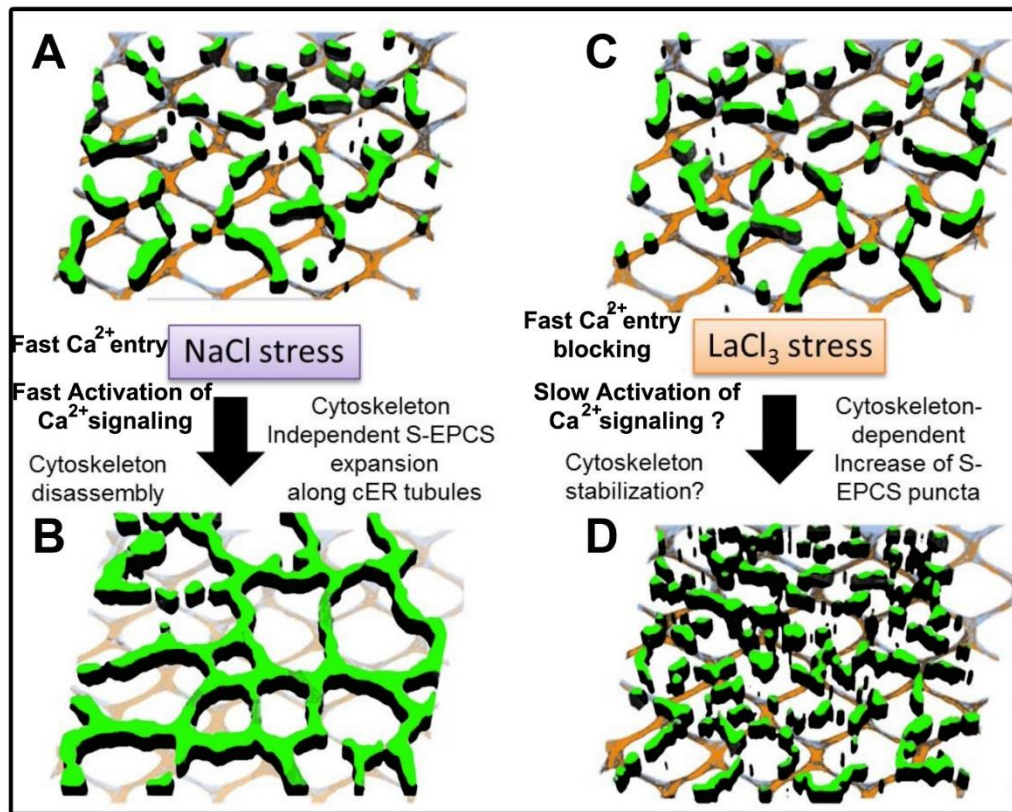

**Figure 7. Summary of S-EPCS remodeling mechanisms in response to NaCl and  $\text{LaCl}_3$  stress. (A-B)** NaCl stress destabilize the cortical cytoskeleton (orange/blue mesh) and promotes the relocation of SYT1 along the cER tubules effectively promoting cytoskeleton-independent S-EPCS expansions **(C-D)** Long-term treatments with  $\text{LaCl}_3$  activate endocytosis, increase the activity of the Calmodulin –based sensor GCaMP3, and promote the cytoskeleton-dependent accumulation of SYT1 and SYT5 tethers at the cell cortex effectively increasing the number of S-EPCS.
